# Supplementary material for: Effects of soil water content on carbon sink strength in an alpine swamp meadow of the northeastern Qinghai-Tibet Plateau
Source: Copernicus journal article supplement (doi:10.5194/bg-2021-193), 2021-09-06
Supplement: Supplementary file 1 [file bg-2021-193-supplement.pdf]

## Supplementary information

**Table S1. Temporal scale, time aggregation, sample size and number of random forests utilized in the Random Forest analysis.**

| Temporal scale | Time aggregation | Sample size | Number of random forests<br>(per variable and per flux) |
|----------------|------------------|-------------|---------------------------------------------------------|
| Diurnal        | Hourly           | 23323       | 24 (every hour)                                         |
| Seasonal       | Hourly           | 23323       | 8 (every 2 weeks)                                       |
| Annual         | Hourly           | 23323       | 5 (every year + entire period)                          |

**Table S2. Seasonally aggregated environmental drivers and C fluxes in the late growing season of 2014, 2015, and 2018 and their relative difference between years.**

| Period       | Ta (°C) | SWC (%)  | NEE (g C/m <sup>2</sup> ) | Re (g C/m <sup>2</sup> ) | GPP (g C/m <sup>2</sup> ) |
|--------------|---------|----------|---------------------------|--------------------------|---------------------------|
| 2014 Late GS | 6.8±2.6 | 80.7±4.1 | -175.6                    | 152.7                    | 328.3                     |
| 2015 Late GS | 6.8±2.5 | 68.3±4.3 | -141.6                    | 191.9                    | 333.5                     |
| 2018 Late GS | 8.5±3.4 | 80.8±3.8 | -134.3                    | 225.4                    | 359.7                     |
| 2015 - 2014  | 0.8%    | -15.4%   | -19.4%                    | 25.7%                    | 1.6%                      |
| 2018 - 2014  | 25%     | 0.1%     | -23.5%                    | 47.6%                    | 9.6%                      |

Note: late GS represents late (Aug. - Sep.) growing season.

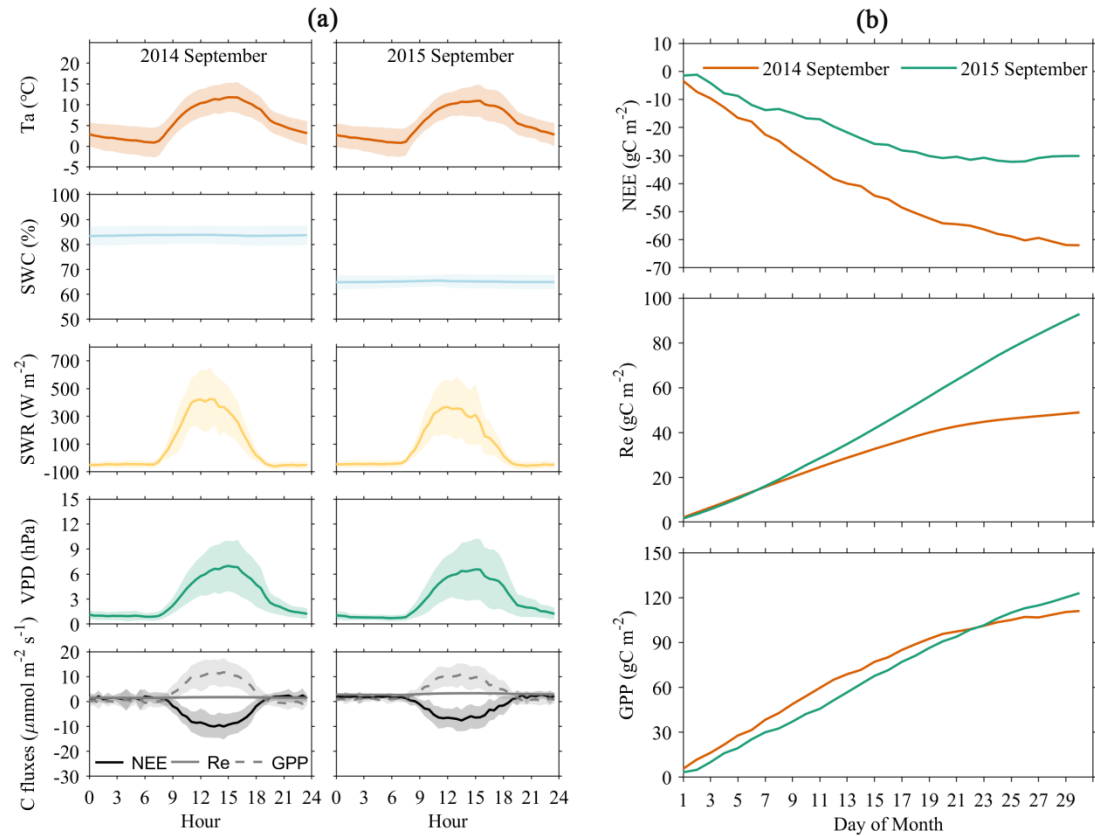

**Fig. S1. (a) Comparisons of the diurnal variations of environmental drivers (Ta, SWC, Rn, and VPD) and C fluxes (NEE, Re, and GPP) between September 2014 and September 2015. The shading represents the mean  $\pm$  standard deviation of the presented variables. (b) Comparisons of the daily accumulated C fluxes (NEE, Re, and GPP) between September 2014 and September 2015.**

**Table S3. Daily aggregated environmental drivers and C fluxes in 2014 and 2015 September.**

| Period         | Ta<br>(°C)    | SWC<br>(%)     | NEE<br>(g C/m <sup>2</sup> ) | Re<br>(g C/m <sup>2</sup> ) | GPP<br>(g C/m <sup>2</sup> ) |
|----------------|---------------|----------------|------------------------------|-----------------------------|------------------------------|
| 2014 September | 5.8 $\pm$ 2.5 | 83.7 $\pm$ 3.7 | -62.0                        | 49.0                        | 111.0                        |
| 2015 September | 5.4 $\pm$ 2.2 | 65.1 $\pm$ 2.4 | -30.2                        | 92.8                        | 123.0                        |
| 2015 - 2014    | -6.8%         | -22.2%         | -51.3%                       | 89.4%                       | 11.0%                        |
